# Supplementary material for: IL-20 Cytokines Are Involved in Epithelial Lesions Associated with Virus-Induced COPD Exacerbation in Mice
Source: MDPI journal article supplement (doi:10.3390/biomedicines9121838), 2021-12-05
Supplement: s1 [file s1]

# **IL-20 Cytokines Are Involved in Epithelial Lesions Associated with Virus-Induced COPD Exacerbation in Mice**

**Mélina Le Roux <sup>1</sup>, Anaïs Ollivier <sup>1</sup>, Gwenola Kervoaze <sup>1</sup>, Thimothé Becke, Laurent Gillet <sup>2</sup>, Muriel Pichavant <sup>1</sup> and Philippe Gosset <sup>1,\*</sup>**

<sup>1</sup> CIIL-Center for Infection and Immunity of Lille, CHRU Lille, Institute Pasteur de Lille, University Lille, CNRS UMR9017, Inserm U1019, 59000 Lille, France; melina.le-roux@pasteur-lille.fr (M.L.R.); anais.ollivier@pasteur-lille.fr (A.O.); gwenola.kervoaze@pasteur-lille.fr (G.K.); timotheebeke@gmail.com (T.B.); muriel.pichavant@pasteur-lille.fr (M.P.)

<sup>2</sup> Immunology-Vaccinology Laboratory, Department of Infection and Parasitic Diseases, FARAH, University of Liege, 4000 Liege, Belgium; L.gillet@ulg.ac.be

\* Correspondence: philippe.gosset@pasteur-lille.fr; Tel.: +33-320-877-965

**Supplemental Figures**

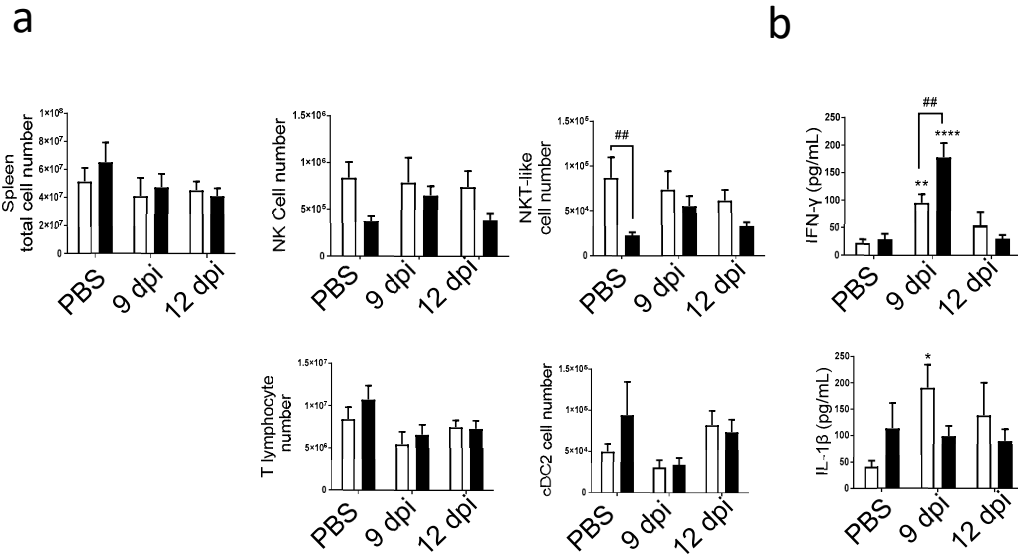

**Figure S1. PVM infection modulates splenic and blood inflammatory response in Air and CS mice.** (a) Total cell number, CD45+/TCR $\beta$ -/NK1.1+ NK cells, CD45+/TCR $\beta$ + NK1.1+ NKT like cells, CD45+/TCR $\beta$ + T lymphocytes and CD45+/ F4/80-/ CD11c+, CD11b+ dendritic cells (cDC2) count were analysed in spleen tissue of Air (white bars) and CS mice (Black bars). (b) Circulating IFN- $\gamma$  and IL-1 $\beta$  levels were analysed by ELISA in sera. Data represent the mean  $\pm$  SEM. \*  $p < 0.05$ , \*\*  $p < 0.01$  and \*\*\*  $p < 0.0001$  correspond to virus effect (PVM vs PBS). ##  $p < 0.01$  correspond to CS effect (CS vs. Air)

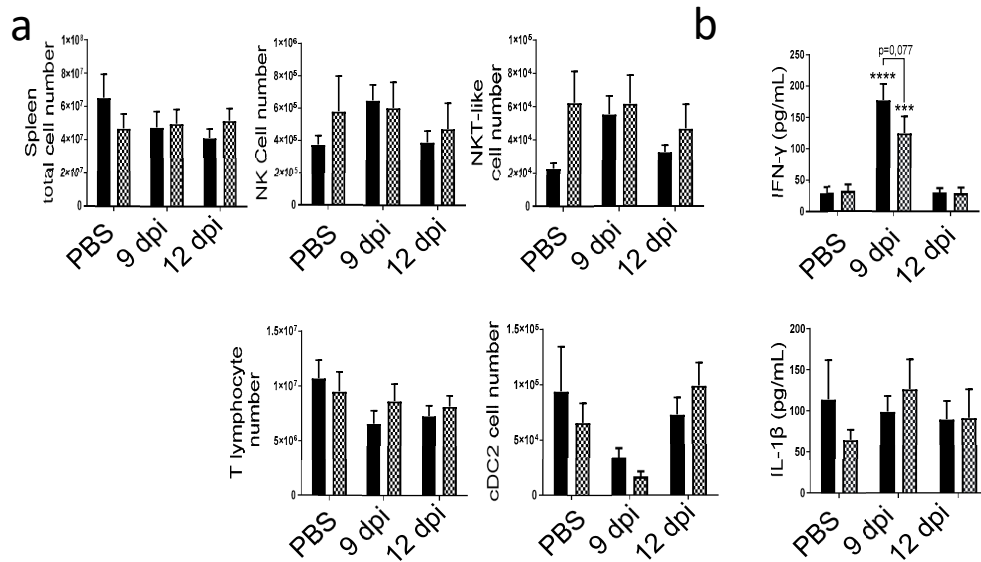

**Figure S2. PVM infection modulates splenic and blood inflammatory response in CS-exposed WT and IL-20Rb KO mice.** (a) Total cell number, CD45+/TCRβ-/NK1.1+ NK cells, CD45+/TCRβ+/NK1.1+ NKT like cells, CD45+/TCRβ+ CD4+ and CD8+ T lymphocytes and CD45+/ F4/80-/ CD11c+/CD11b+ dendritic cells (cDC2) count were analysed in spleen of WT (Black bars) and IL-20Rb KO mice (grey bars). (b) Circulating IFN-γ and IL-1β levels were analysed by ELISA. Data represent the mean ± SEM. \*\*\*  $p < 0.001$  and \*\*\*\*  $p < 0.0001$  correspond to virus effect (PVM vs PBS).

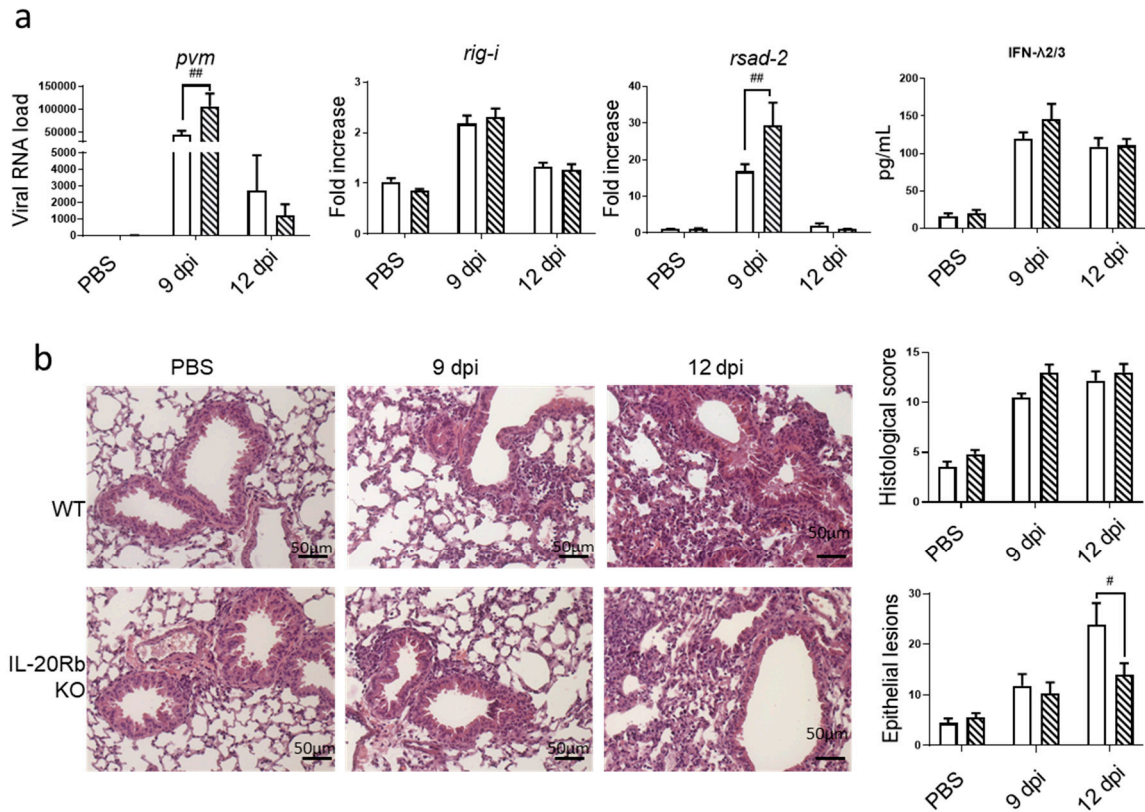

**Figure S3. Impact of IL-20Rb depletion on PVM infection in Air-exposed mice. (a)** viral load and antiviral response including mRNA expression *rig-i*, *rsad-2*, evaluated by RT-qPCR in lung tissues. Results were expressed as fold increase compared to Air mice exposed to PBS using *hprt1* expression as a housekeeping gene. IFN-λ2/3 was evaluated by ELISA (pg/mL) **(b)** Histological changes were evaluated at 9 and 12 dpi. Scale bar = 50 μm. Histological score analysis including epithelial damages are expressed as mean ± SEM. WT mice (white bars) and IL-20Rb KO mice (Hashed bars). #  $p < 0.05$ , ##  $p < 0.01$ , correspond to IL-20Rb KO effect (IL-20Rb KO vs. WT). Three independent experiments have been performed with 3-5 mice in each group per experiment.

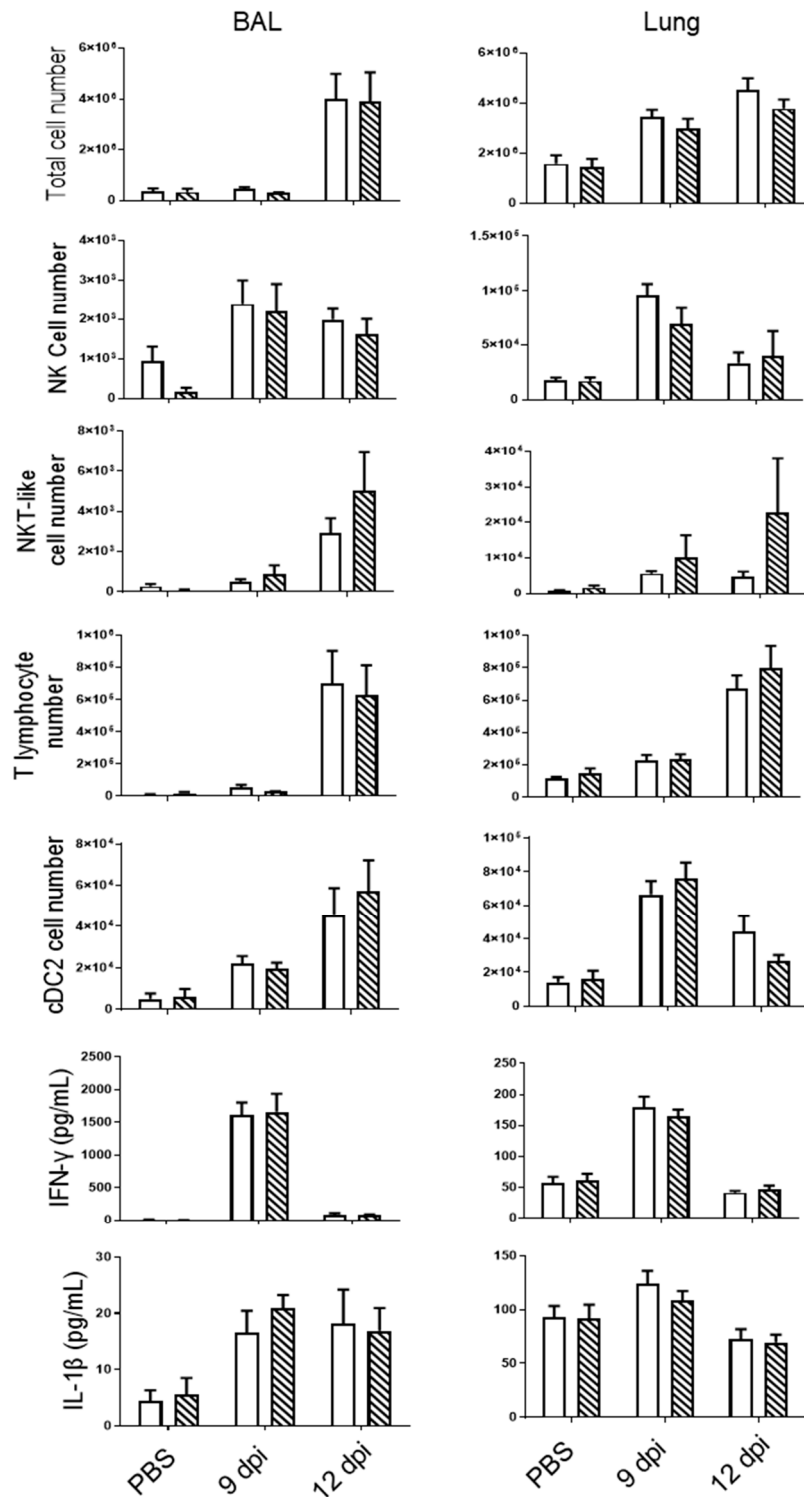

**Figure S4. PVM infection induces lung inflammation both in WT and IL-20Rb KO mice.** Total cell number, CD45<sup>+</sup>/TCR $\beta$ <sup>-</sup>/NK1.1<sup>+</sup> NK cells, CD45<sup>+</sup>/TCR $\beta$ <sup>+</sup>/NK1.1<sup>+</sup> NKT like cells, CD45<sup>+</sup>/TCR $\beta$ <sup>+</sup> CD4<sup>+</sup> and CD8<sup>+</sup> T lymphocytes and CD45<sup>+</sup>/ F4/80<sup>-</sup>/ CD11c<sup>+</sup> dendritic cells (cDC2) count were analysed in BAL fluid and lung tissue of WT (white bars) and IL-20Rb KO mice (hashed bars). IFN- $\gamma$  and IL-1 $\beta$  levels were analysed by ELISA (pg/mL). Data represent the mean  $\pm$  SEM. Three independent experiments have been performed with 3-5 mice in each group per experiment.

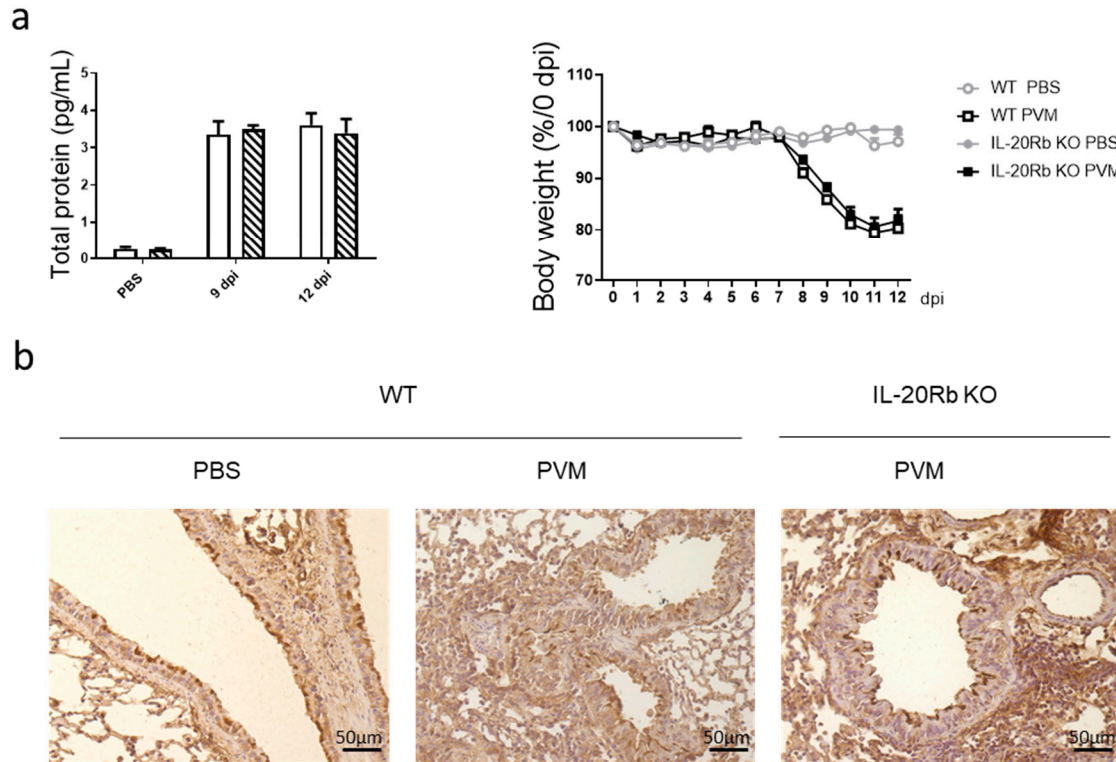

**Figure S5. PVM infection affects E-cadherin protein expression in Air mice.** (a) Lung permeability was analysed through the quantification of total protein in BAL fluid (pg/mL). (White bars) and IL-20Rb KO mice (Hashed bars). The body weight loss was evaluated following PVM infection and was expressed in percentage in comparison to day 0 (b) Expression of e-cadherin was evaluated on lung sections by immunohistochemistry at 12 dpi in Air WT mice. Scale bar = 50  $\mu$ m. Data represent the mean  $\pm$  SEM. Three independent experiments have been performed with 3-5 mice in each group per experiment..
